# Supplementary material for: Highly sensitive pork meat detection using copper(ii) tetraaza complex by electrochemical biosensor
Source: Royal Society of Chemistry journal article supplement (doi:10.1039/d2ra05701h), 2023-01-01
Supplement: d2ra05701h1.pdf [file d2ra05701h1.pdf]

## Supplementary materials

### Highly sensitive pork meat detection using copper(II) tetraaza complex by electrochemical biosensor

Noraisyah Abdul Kadir Jilani, Emma Izzati Zakariah, Eda Yuhana-Arifin, Suhaila Sapari, Devika Nokarajoo, Bohari Yamin, Siti Aishah Hasbullah\*

#### Contents

- |    |                                                |    |
|----|------------------------------------------------|----|
| 1. | Absorption spectra DNA titration               | S1 |
| 2. | Luminescence spectra DNA titration             | S2 |
| 3. | Optimized DPV parameters for porcine detection | S2 |
| 4. | Porcine DNA biosensor parameter optimization   | S2 |

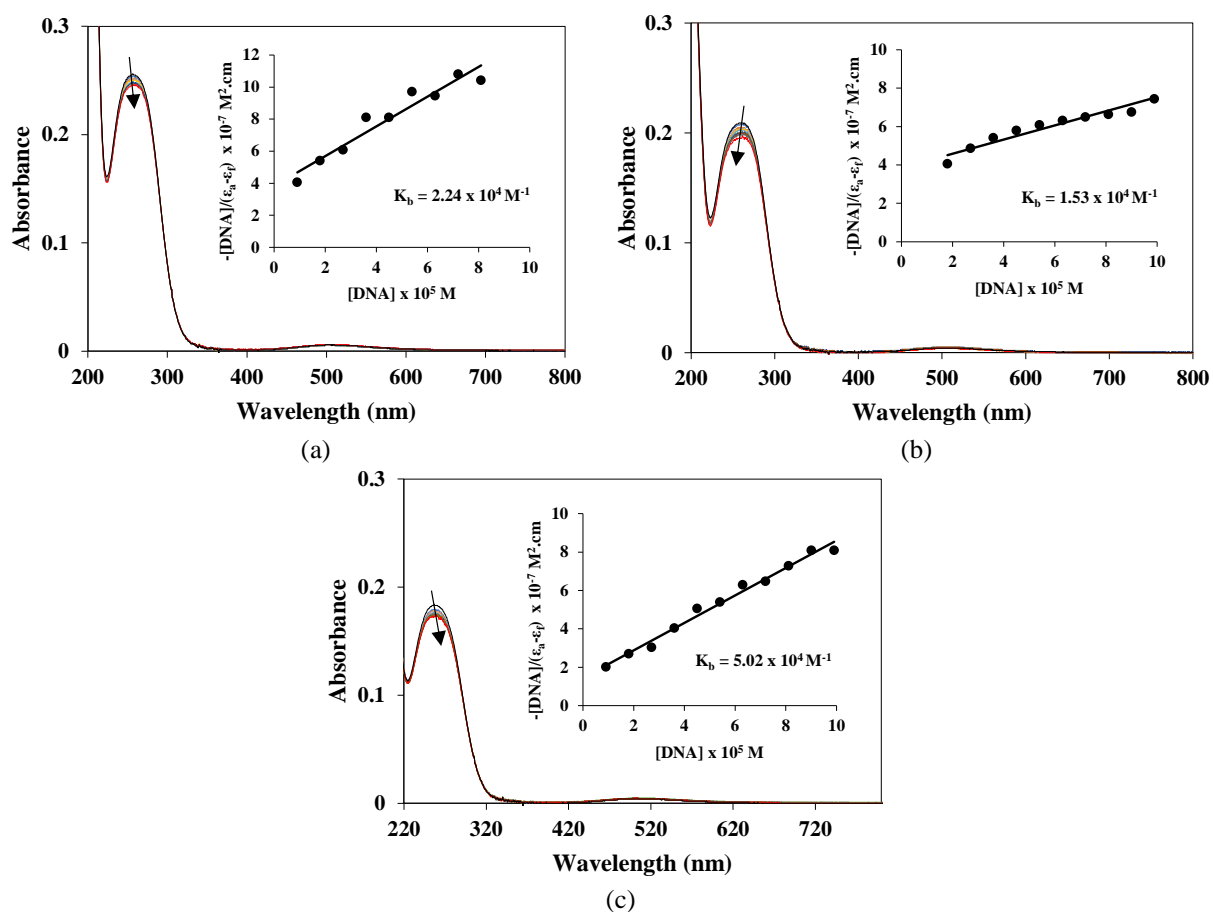

Fig. S1. Absorption spectra for complex (a) **1a**, (b) **2a**, (c) **2b** in Tris-HCl buffer after DNA addition. [**1a**, **2a**, **2b**] = 90  $\mu\text{M}$ , [DNA] = 0–135  $\mu\text{M}$ . Inset displayed reciprocal plot  $[\text{DNA}]/(\epsilon_a - \epsilon_f)$  vs. [DNA] for DNA titration with **1a**, **2a**, **2b**.

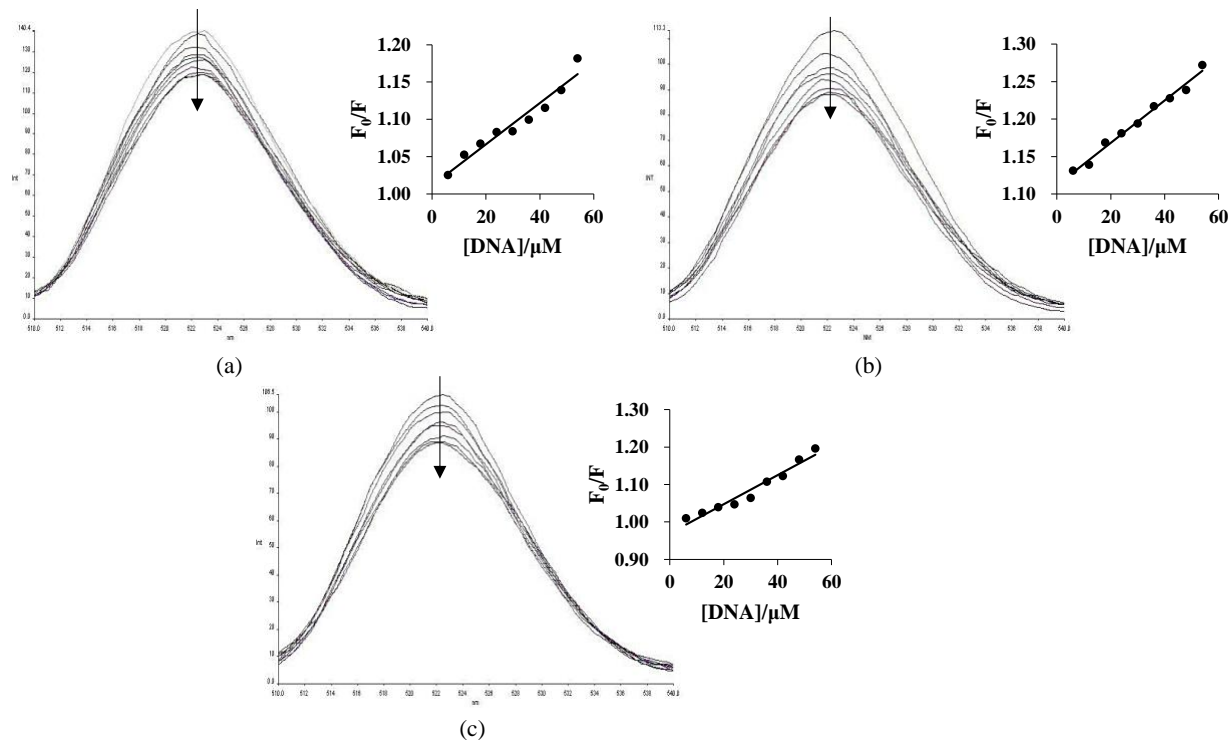

Fig. S2. Fluorescence emission spectrum of complex (a) **1a**, (b) **2a**, (c) **2b** as the volume of CT-DNA increases. The inset demonstrates the Stern Volmer plot for the binding with CT-DNA

Table S1. Optimized DPV parameters for porcine detection

| Parameters                     | Results |
|--------------------------------|---------|
| Initial potential (V)          | -0.8    |
| Final potential (V)            | 1.1     |
| Pulse amplitude (mV)           | 20      |
| Pulse time (ms)                | 80      |
| Scan rate (mVs <sup>-1</sup> ) | 5       |
| Equilibration time (s)         | 5       |

Table S2. Porcine DNA biosensor parameter optimization

| Parameters                                  | Optimum amount       |
|---------------------------------------------|----------------------|
| Amount of AuNPs                             | 15 $\mu$ L           |
| Concentration of MPA                        | 1 mM                 |
| Concentration of NHS: EDC                   | 100 mM:400mM         |
| Concentration of potassium phosphate buffer | 0.05 M               |
| pH of Potassium phosphate buffer            | pH 7                 |
| Concentration of DNA probe                  | 5 $\mu$ M            |
| Hybridization time                          | 1 hour               |
| Concentration of complex <b>2b</b>          | $3 \times 10^{-5}$ M |
